# Supplementary material for: HHIP overexpression inhibits the proliferation, migration and invasion of non-small cell lung cancer
Source: PLoS One. 2019 Nov 25;14(11):e0225755. doi: 10.1371/journal.pone.0225755 (PMC6876884; doi:10.1371/journal.pone.0225755)
Supplement: S3 Table — (XLSX) [file pone.0225755.s003.xlsx]

## Sheet: GSE43458
NO	tumer	normal
1	2.70236	3.26134
2	2.89477	2.92866
3	2.75227	3.19504
4	3.05839	3.4873
5	2.57256	3.3271
6	3.06242	2.84812
7	2.84502	3.41613
8	2.69212	3.40394
9	3.33336	3.37566
10	2.84116	3.39823
11	2.88679	3.24622
12	3.02678	3.35734
13	2.66292	3.10746
14	3.19511	3.41753
15	2.63565	3.23815
16	3.48152	3.36191
17	2.91313	3.31255
18	2.84145	3.15486
19	2.75215	3.13966
20	3.03781	3.33787
21	3.56165	3.33781
22	3.14296	3.24241
23	3.25244	3.44945
24	2.50148	3.34484
25	2.69433	3.38135
26	2.98724	3.51079
27	2.99494	3.07145
28	3.0953	3.27712
29	2.6479	3.33818
30	3.18977	3.27468
31	3.46493
32	2.98332
33	2.62974
34	2.92525
35	3.00348
36	3.34405
37	2.9134
38	2.62857
39	2.82027
40	2.82142
41	2.81992
42	3.08561
43	2.85776
44	2.81608
45	2.92441
46	2.54289
47	2.752
48	2.51189
49	2.91969
50	2.72157
51	2.75442
52	2.75975
53	2.50554
54	2.65596
55	2.45651
56	2.91253
57	2.73502
58	2.60098
59	3.03783
60	2.81046
61	2.52237
62	2.81554
63	3.18845
64	3.07357
65	2.57584
66	2.58358
67	2.54916
68	2.53087
69	3.15071
70	2.44387
71	2.80119
72	3.08004
73	2.54826
74	3.26611
75	2.76921
76	3.09677
77	3.11342
78	2.75463
79	2.50911
80	2.86928
